# Supplementary material
Source: PubMed Central journal article supplement (PMC2775841)
Supplement: mmc1.pdf [file mmc1.pdf]

Supplemental Data

*AJHG*, Volume 85

**The Relationship between Imputation Error and  
Statistical Power in Genetic Association Studies  
in Diverse Populations**

Lucy Huang, Chaolong Wang, and Noah A. Rosenberg

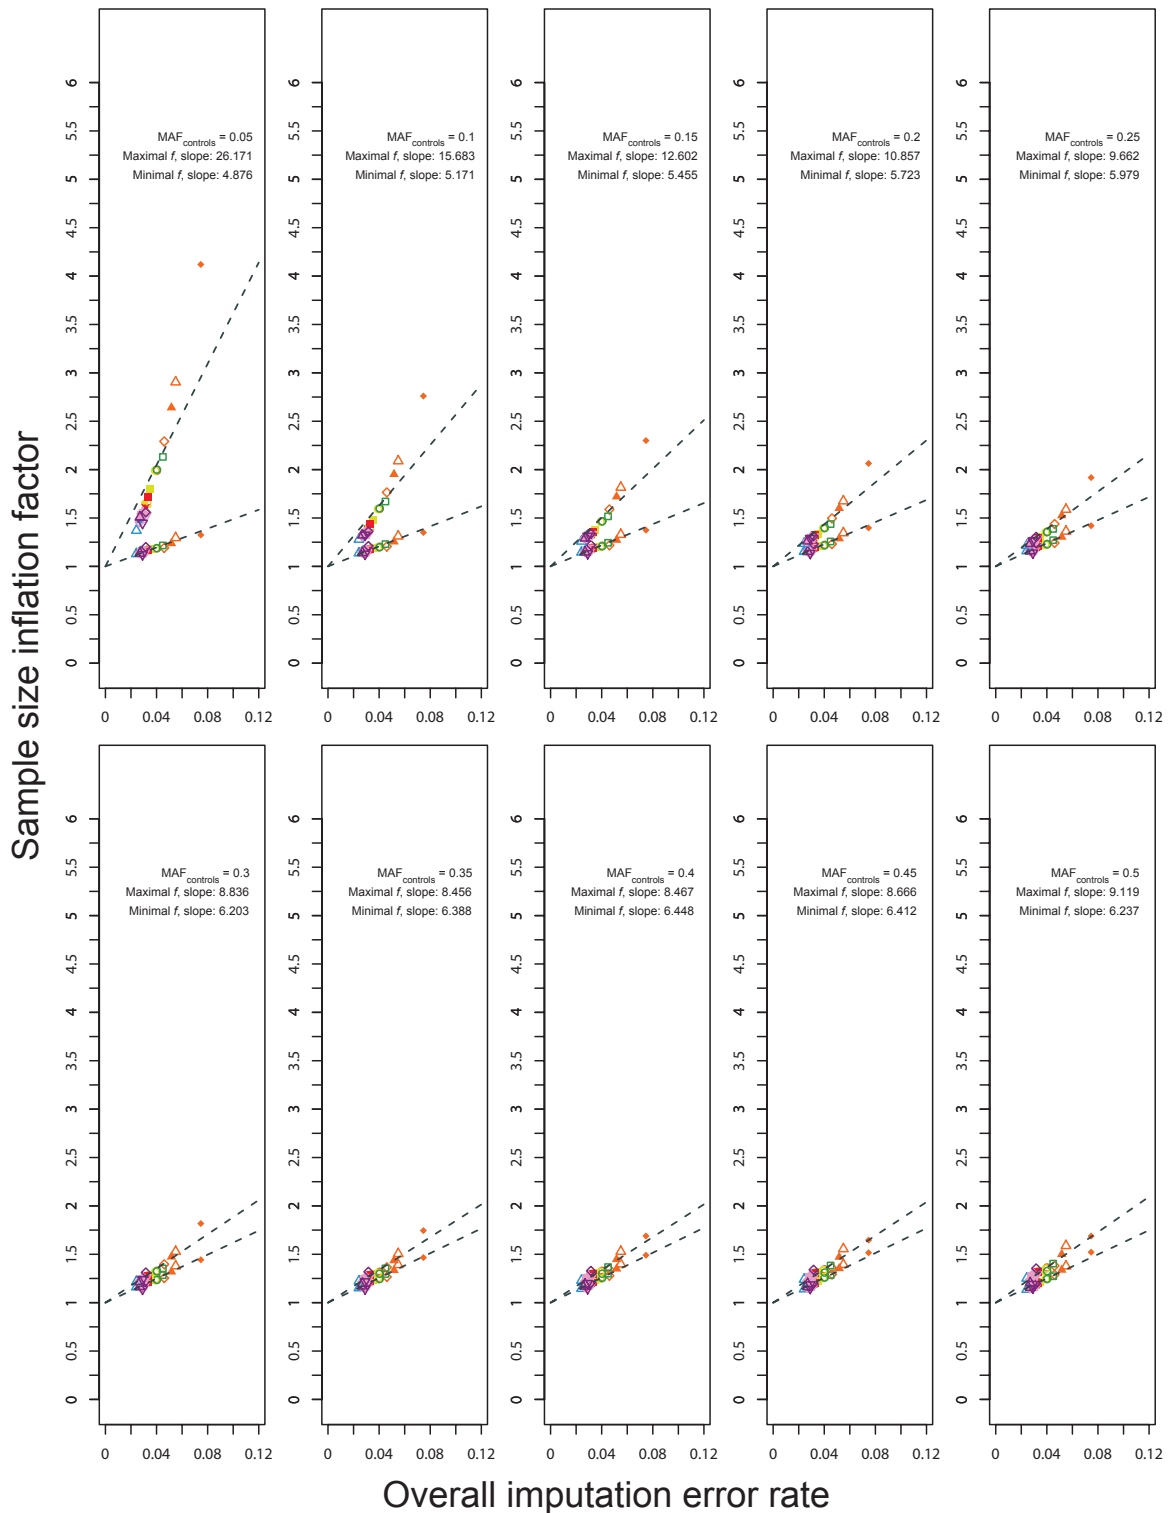

Figure S1: Maximal and minimal sample-size inflation factors as functions of the overall imputation error rate, for an imputed disease locus with true minor allele frequency fixed in controls, excluding the San and Mbuti Pygmy populations. Each plot has  $MAF_{controls}$  fixed at a different value. Population symbols are the same as in Figure 4, and two data points appear for each population, a maximum and a minimum. Best-fit linear regression lines for the maxima and minima, forced through the point (0,1), indicate the increase in the inflation factor with increasing imputation error rate.

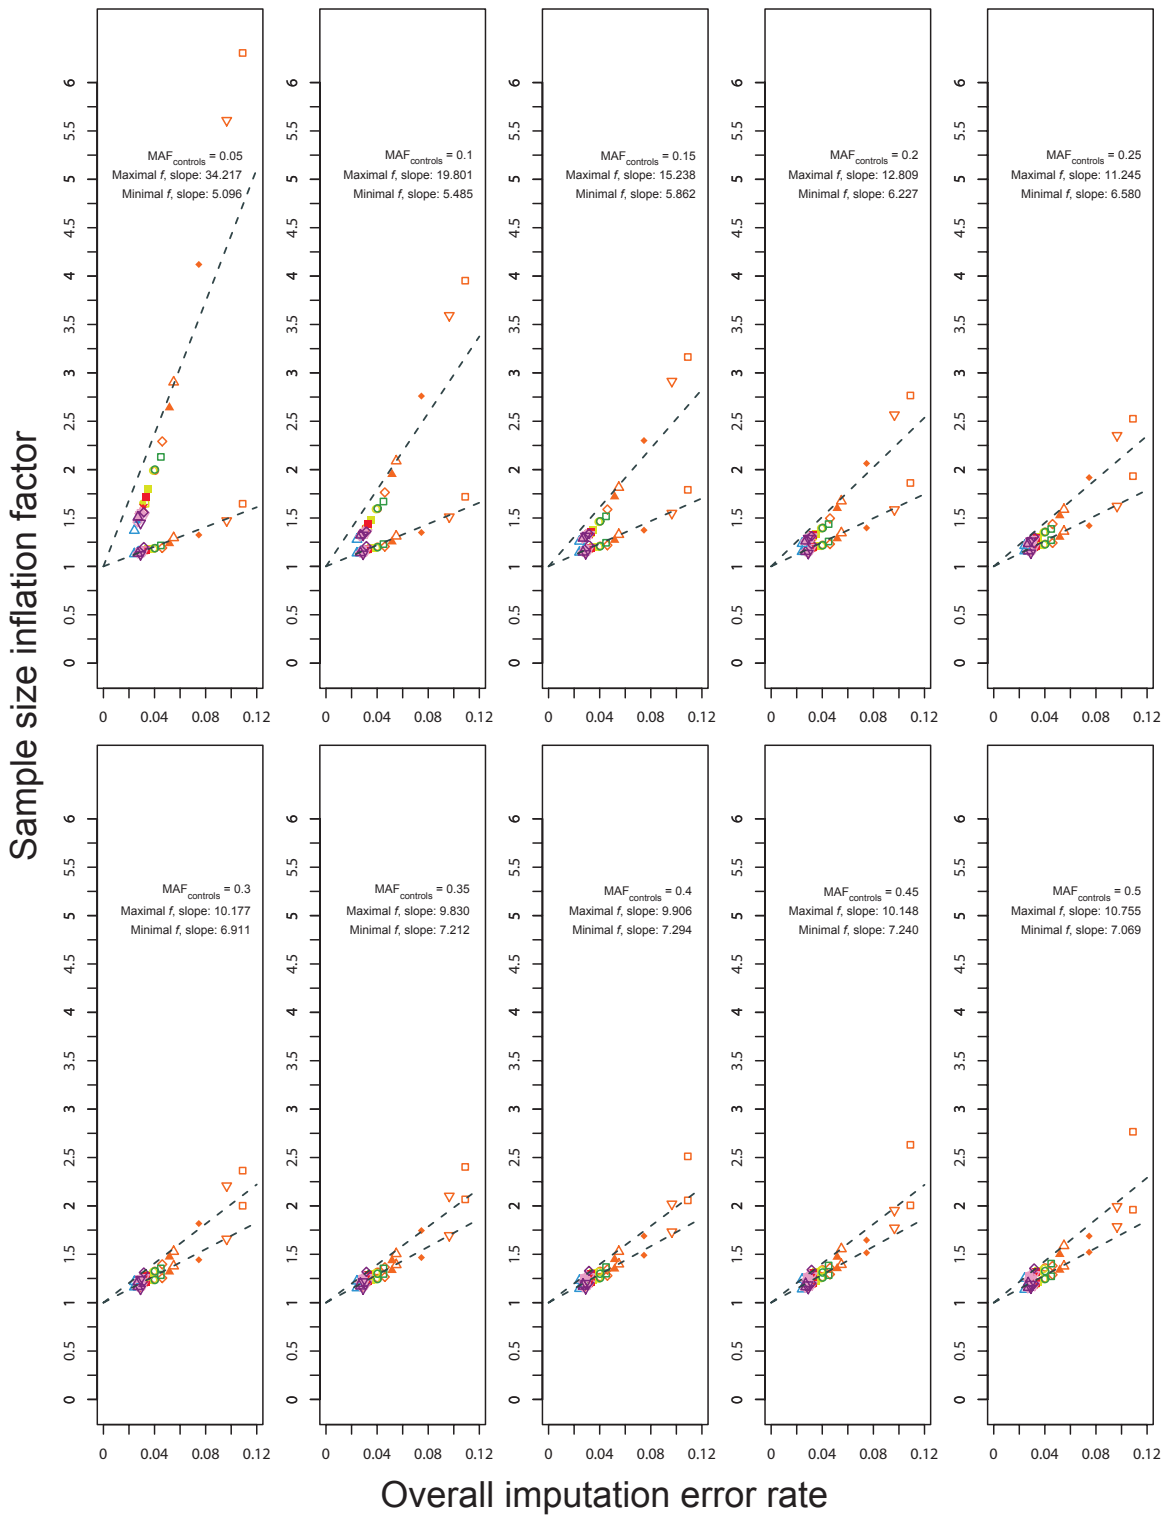

Figure S2: Maximal and minimal sample-size inflation factors as functions of the overall imputation error rate, for an imputed disease locus with true minor allele frequency fixed in controls, considering all 29 populations. Each plot has  $MAF_{controls}$  fixed at a different value. Population symbols are the same as in Figure 4, and two data points appear for each population, a maximum and a minimum. Best-fit linear regression lines for the maxima and minima, forced through the point (0,1), indicate the increase in the inflation factor with increasing imputation error rate. The plot for  $MAF_{controls} = 0.3$  also appears in Figure 4.

Table S1: Genotype misclassification error rates  $\epsilon_{ij}$  in each of 29 populations. Each column shows a particular error rate  $\epsilon_{ij}$ , where  $\epsilon_{ij}$  represents the probability that genotype  $i$  is imputed as genotype  $j$  (1, minor allele homozygote; 2, heterozygote; 3, major allele homozygote). For each population, the greatest of the six error rates is shown in bold. The values of  $\epsilon_{ij}$  are identical to those plotted in Figure 1. The final column represents the overall imputation error rate, a weighted sum of the six  $\epsilon_{ij}$  with the weights determined by the frequencies of the three categories of genotype.

| Population        | $\epsilon_{12}$ | $\epsilon_{13}$ | $\epsilon_{21}$ | $\epsilon_{23}$ | $\epsilon_{31}$ | $\epsilon_{32}$ | Overall imputation error rate |
|-------------------|-----------------|-----------------|-----------------|-----------------|-----------------|-----------------|-------------------------------|
| San               | <b>0.236</b>    | 0.082           | 0.101           | 0.180           | 0.037           | 0.104           | 0.109                         |
| Mbuti Pygmy       | 0.159           | 0.059           | 0.067           | <b>0.161</b>    | 0.034           | 0.103           | 0.096                         |
| Biaka Pygmy       | <b>0.134</b>    | 0.038           | 0.045           | 0.111           | 0.026           | 0.086           | 0.075                         |
| Bantu (Kenya)     | <b>0.101</b>    | 0.035           | 0.028           | 0.073           | 0.021           | 0.053           | 0.052                         |
| Bantu (S. Africa) | <b>0.108</b>    | 0.049           | 0.027           | 0.066           | 0.023           | 0.063           | 0.055                         |
| Yoruba            | <b>0.073</b>    | 0.030           | 0.021           | 0.050           | 0.023           | 0.034           | 0.040                         |
| Mandenka          | <b>0.080</b>    | 0.025           | 0.027           | 0.065           | 0.022           | 0.042           | 0.046                         |
| Mozabite          | <b>0.073</b>    | 0.027           | 0.019           | 0.045           | 0.023           | 0.035           | 0.039                         |
| Bedouin           | <b>0.057</b>    | 0.038           | 0.020           | 0.040           | 0.019           | 0.028           | 0.035                         |
| Palestinian       | <b>0.057</b>    | 0.033           | 0.017           | 0.040           | 0.020           | 0.023           | 0.033                         |
| Druze             | <b>0.047</b>    | 0.028           | 0.014           | 0.032           | 0.020           | 0.024           | 0.031                         |
| Basque            | 0.034           | <b>0.037</b>    | 0.009           | 0.022           | 0.021           | 0.018           | 0.027                         |
| Russian           | <b>0.049</b>    | 0.027           | 0.011           | 0.028           | 0.018           | 0.013           | 0.024                         |
| Adygei            | <b>0.038</b>    | 0.022           | 0.011           | 0.027           | 0.021           | 0.017           | 0.027                         |
| Balochi           | <b>0.046</b>    | 0.036           | 0.015           | 0.038           | 0.020           | 0.021           | 0.031                         |
| Kalash            | <b>0.044</b>    | 0.036           | 0.015           | 0.028           | 0.021           | 0.022           | 0.031                         |
| Burusho           | <b>0.060</b>    | 0.032           | 0.018           | 0.033           | 0.021           | 0.026           | 0.033                         |
| Uygur             | <b>0.048</b>    | 0.021           | 0.012           | 0.022           | 0.024           | 0.020           | 0.029                         |
| Yakut             | <b>0.050</b>    | 0.034           | 0.015           | 0.027           | 0.025           | 0.019           | 0.032                         |
| Mongola           | <b>0.064</b>    | 0.025           | 0.011           | 0.029           | 0.023           | 0.020           | 0.029                         |
| Daur              | <b>0.057</b>    | 0.026           | 0.011           | 0.025           | 0.021           | 0.020           | 0.028                         |
| Yi                | <b>0.057</b>    | 0.028           | 0.009           | 0.023           | 0.024           | 0.021           | 0.029                         |
| Cambodian         | <b>0.050</b>    | 0.016           | 0.013           | 0.032           | 0.023           | 0.019           | 0.030                         |
| Lahu              | <b>0.045</b>    | 0.025           | 0.013           | 0.021           | 0.022           | 0.017           | 0.027                         |
| Melanesian        | <b>0.059</b>    | 0.030           | 0.025           | 0.041           | 0.024           | 0.035           | 0.040                         |
| Papuan            | <b>0.068</b>    | 0.037           | 0.036           | 0.047           | 0.025           | 0.038           | 0.045                         |
| Pima              | <b>0.043</b>    | 0.012           | 0.011           | 0.019           | 0.029           | 0.017           | 0.029                         |
| Maya              | <b>0.032</b>    | 0.027           | 0.016           | 0.027           | 0.019           | 0.018           | 0.027                         |
| Colombian         | <b>0.054</b>    | 0.051           | 0.013           | 0.031           | 0.023           | 0.020           | 0.032                         |
